# Supplementary material
Source: MDPI journal article supplement (https://www.mdpi.com/2073-4395/5/3/322)
Supplement: s1 [file s1]

Supplementary Information

S1 Method for Solid State Cyclic Voltammetry

The amount of blackmix corresponding to 20 mg of biochar is then weighed out and transferred to a stainless steel cup cell in which the cylindrical walls are Teflon lined.

The blackmix in the cup cell is then covered by two layers of separator paper (Whatman No. 50 filter paper). A close-fitting stainless steel piston was then inserted into the cell and used, together with a hydraulic press (1 tonne), to compact the blackmix into a composite working electrode in very good contact (low impedance) with the stainless steel base of the cup. After compaction, the piston is removed and replaced with a perforated Perspex disk (used to maintain the physical integrity of the electrode, all the while allowing ready access of electrolyte), and a stainless steel sleeve lining the inner cylindrical surface of the Teflon to act as a counter electrode. A Perspex cap is put into the top of the cell, which is then held in place with a cover and base plate secured by three nuts and bolts tightened to 75 cNm to ensure a uniform pressure on the electrode. ~15 mL of pH 7 buffer electrolyte was added to the internal cavity within the cell, and a saturated calomel reference electrode (SCE) inserted to complete the cell. Note that all potentials reported here are with respect to the SCE.
A schematic of the electrochemical cell is shown in Figure 2. The cell is then allowed to equilibrate with the electrolyte for 1 h after which the working electrode potential was swept from its open circuit value cathodically to −1.2 V, after which the sweep was reversed to an upper potential limit of 0.2 V, and then back down again to −1.2 V. The potential sweep rate is set at 0.05 mV/s.

**Figure S1.** Schematic diagram of the electrochemical cell.


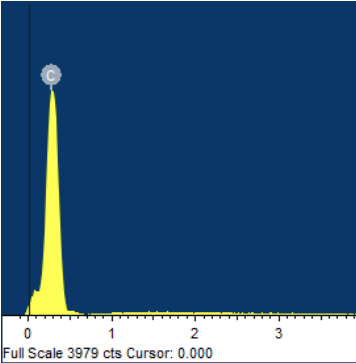

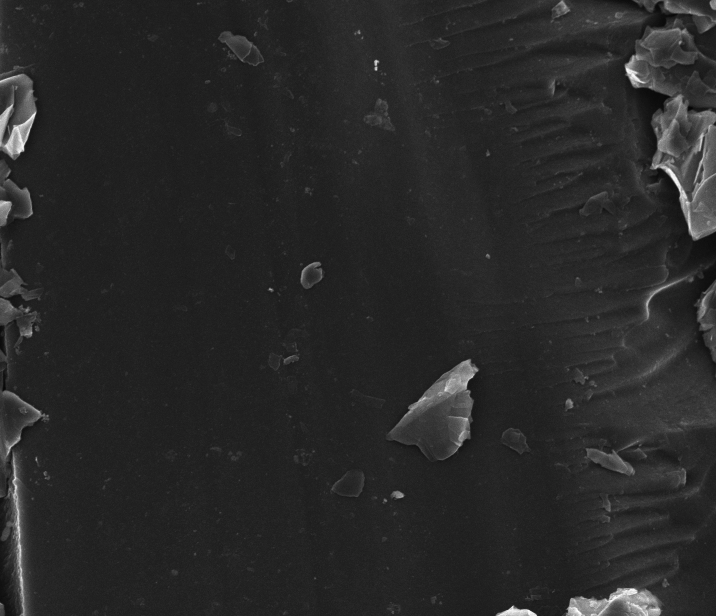

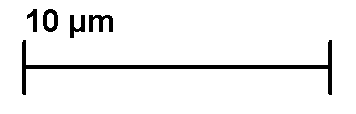


X

**Figure S2.** Secondary electron image of the Undamaged surface examined on Jarrah biochar with EDS spectrum taken recorded from the region marked X.

|  |
| --- |
| (**a**) |
| 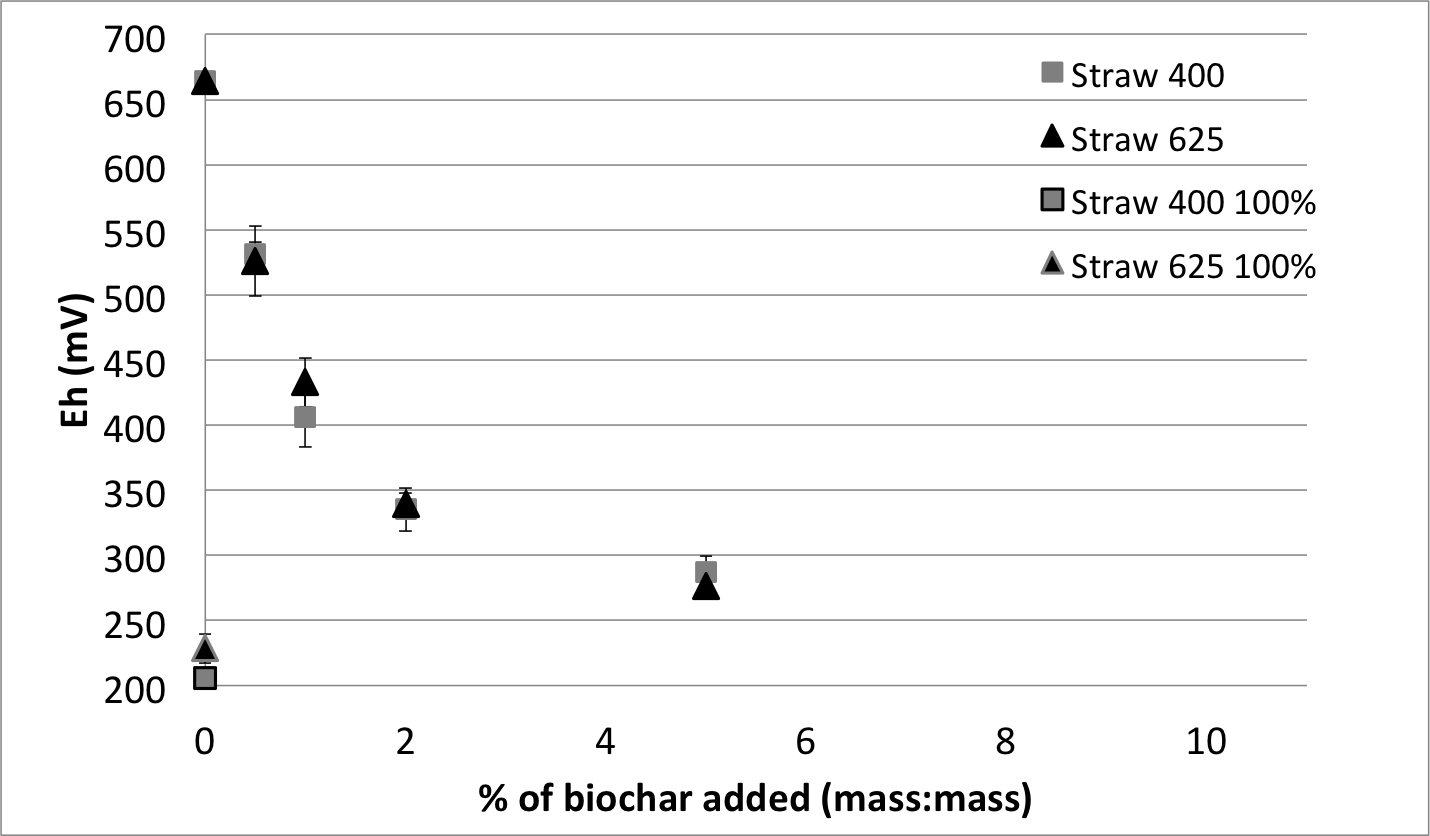 |
| (**b**) |

**Figure S3.** *Cont*.

| 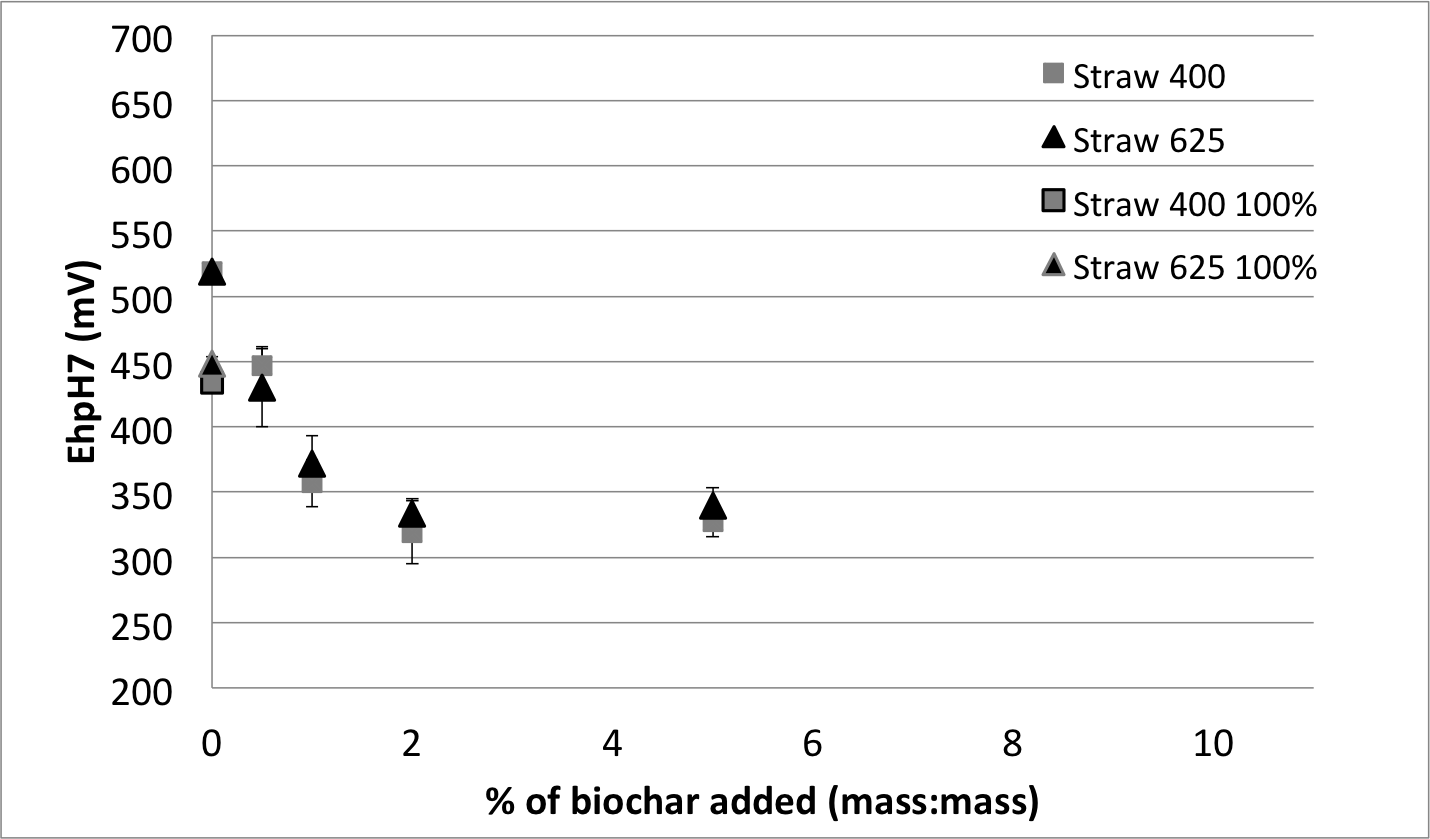 |
| --- |
| (**c**) |

**Figure S3.** (**a**) Eh-pH rice straw Biochar pH uncorrected; (**b**) Eh rice straw Biochar/soil pH uncorrected; (**c**) Eh rice straw Biochar/soil mixture corrected.

|  |
| --- |
| (**a**) |
|  |
| (**b**) |

**Figure S4.** *Cont*.

| 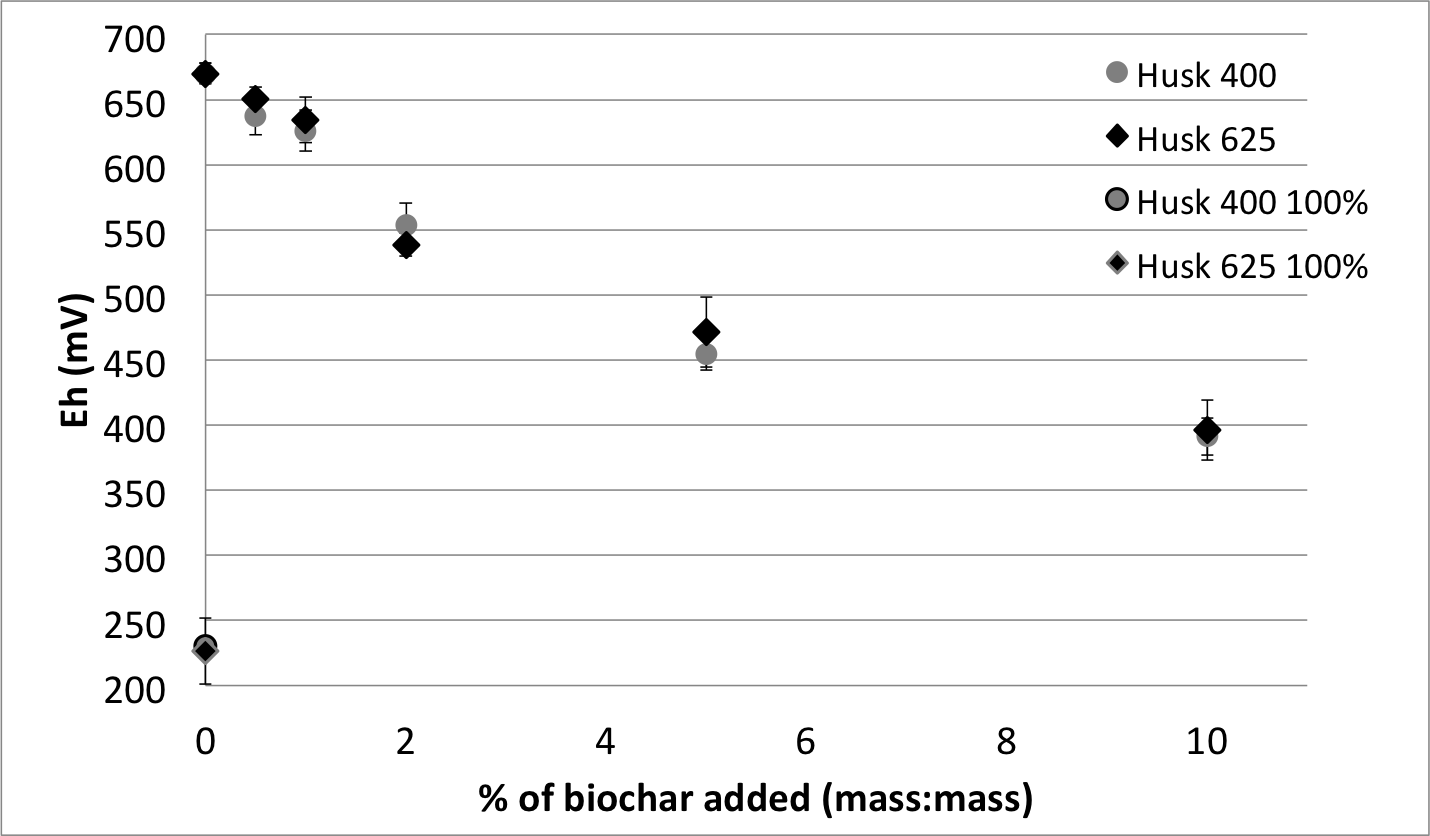 |
| --- |
| (**c**) |
| 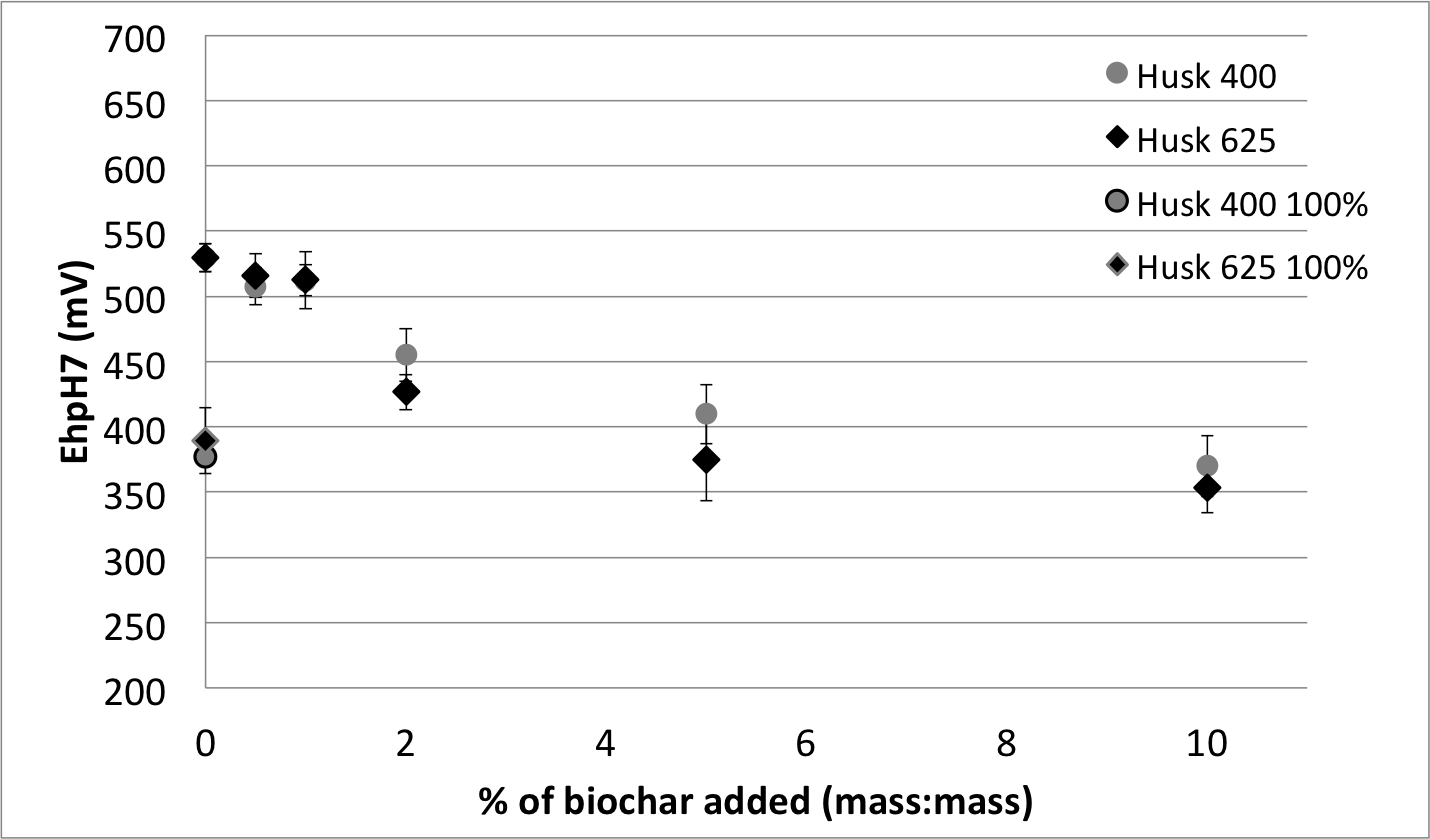 |
| (**d**) |

**Figure S4.** (**a**) Eh-pH rice husk Biochar uncorrected; (**b**) Eh-pH rice husk Biochar corrected; (**c**) Eh rice husk Biochar/Soil mixture uncorrected; (**d**) Eh rice husk Biochar/Soil mixture corrected.

© 2015 by the authors; licensee MDPI, Basel, Switzerland. This article is an open access article distributed under the terms and conditions of the Creative Commons Attribution license (http://creativecommons.org/licenses/by/4.0/).
